# Supplementary material for: Iron oxide nanoparticle-stabilized Pickering emulsion-templated porous scaffolds loaded with polyunsaturated fatty acids (PUFAs) for bone tissue engineering
Source: Royal Society of Chemistry journal article supplement (doi:10.1039/d4tb00286e), 2024-01-01
Supplement: d4tb00286e1.pdf [file d4tb00286e1.pdf]

## Iron oxide nanoparticle-stabilized Pickering emulsion-templated porous scaffolds loaded with polyunsaturated fatty acids (PUFAs) for bone tissue engineering

Aadinath W, Teja KSPS, Iniyan Saravanakumar, and Vignesh Muthuvijayan\*

Bhupat and Jyoti Mehta School of Biosciences, Indian Institute of Technology Madras, Chennai 600 036, Tamil Nadu, India. [\\*vigneshm@iitm.ac.in](mailto:*vigneshm@iitm.ac.in)

| Gene           | 5'-primer sequence-3'         |
|----------------|-------------------------------|
| Beta Actin-Fp  | 5'-CTCACCATGGATGATGATATCGC-3' |
| Beta Actin-Rp  | 5'-AGGAATCCTTCTGACCCATGC-3'   |
| ALP-Fp         | 5'-GACCCTTGACCCCCACAAT-3'     |
| ALP-Rp         | 5'-GCTCGTACTGCATGTCCCCT-3'    |
| BMP2-Fp        | 5'-AACACTGTGCGCAGCTTCC-3'     |
| BMP2-Rp        | 5'-CTCCGGGTTGTTTTCCAC-3'      |
| Osteocalcin-Fp | 5'-GAAGCCCAGCGGTGCA-3'        |
| Osteocalcin-Rp | 5'-CACTACCTCGCTGCCCTCC-3'     |
| RUNX2-Fp       | 5'-ACCCAGAAGGCACAGACAGAAG-3'  |
| RUNX2-Rp       | 5'-AGGAATGCGCCCTAAATCACT-3'   |

**Table S1.** Forward and reverse primers of the osteogenic marker genes and housekeeping gene used for the RT-PCR studies.

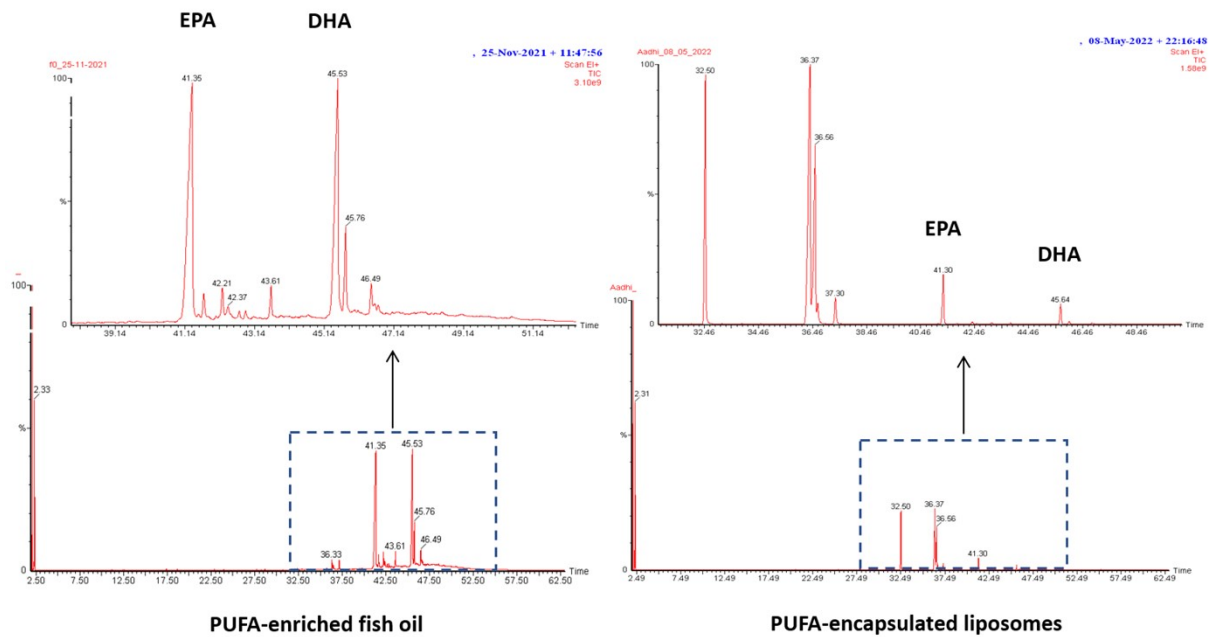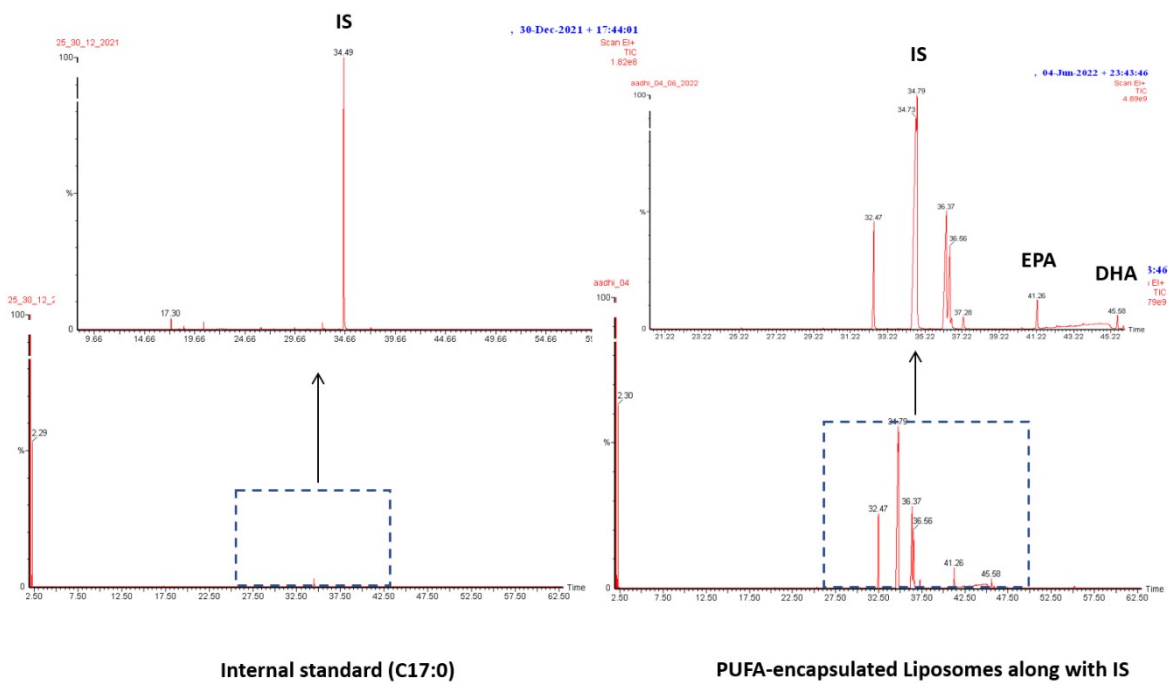

Figure S1. GC-MS chromatogram showing RT of EPA, DHA, and IS in different sample preparations.

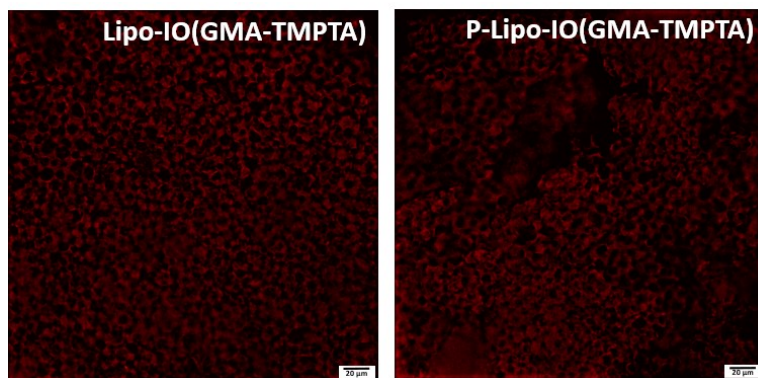

**Figure S2.** Nile red-stained control and PUFA-encapsulated liposomes that were adhered onto the scaffolds.
